# Supplementary material for: Metagenomic Insights Reveal the Microbial Diversity and Associated Algal Polysaccharide-Degrading Enzymes on the Surface of Red Algae among Remote Regions
Source: Preprints.org preprint supplement (doi:10.20944/preprints202305.2067.v1), 2023-05-30
Supplement: Supplementary file 2 [file supplementary]

Supplementary Material

**Supplementary Tables**

Table. S1 Data preprocessing statistics table

| Sample ID | Insert  size (bp) | Raw  data | Clean  data | Clean  Q20 | Clean  Q30 | Clean  GC (%) | Effective  (%) |
| --- | --- | --- | --- | --- | --- | --- | --- |
| NJDZ01 | 350 | 6,300.09 | 6,273.77 | 97.06 | 91.75 | 42.45 | 99.582 |
| NJDZ02 | 350 | 6,159.60 | 6,135.73 | 97.19 | 91.92 | 42.30 | 99.612 |
| NJDZ03 | 350 | 6,345.68 | 6,309.27 | 96.03 | 90.31 | 44.75 | 99.426 |
| YNDZ01 | 350 | 12,079.83 | 12,023.87 | 97.58 | 93.41 | 42.08 | 99.537 |
| YNDZ02 | 350 | 12,975.04 | 12,903.89 | 97.41 | 93.02 | 52.22 | 99.452 |
| YNDZ03 | 350 | 12,258.91 | 12,165.99 | 97.03 | 92.56 | 43.43 | 99.242 |
| WHDZ01 | 350 | 8,632.31 | 8,620.90 | 97.83 | 93.52 | 48.48 | 99.868 |
| WHDZ02 | 350 | 8,508.37 | 8,470.83 | 98.05 | 94.31 | 55.78 | 99.559 |
| WHDZ03 | 350 | 8,351.63 | 8,341.43 | 97.30 | 92.44 | 47.12 | 99.878 |

Table. S2 Assembly results of scaftigs statistics

| Sample ID | Total len.(bp) | Num. | Average len.(bp) | N50 Len.(bp) | N90 Len.(bp) | Max len.(bp) |
| --- | --- | --- | --- | --- | --- | --- |
| NJDZ01 | 290,645,811 | 261,344 | 1,112.12 | 1,174 | 568 | 67,860 |
| NJDZ02 | 296,307,488 | 196,027 | 1,511.56 | 2,121 | 625 | 85,152 |
| NJDZ03 | 400,006,748 | 237,800 | 1,682.11 | 2,421 | 708 | 60,595 |
| YNDZ01 | 5,815,047 | 8,722 | 666.71 | 618 | 515 | 30,251 |
| YNDZ02 | 692,737 | 1,098 | 630.91 | 596 | 512 | 2,077 |
| YNDZ03 | 119,012,136 | 149,150 | 797.94 | 738 | 529 | 26,910 |
| WHDZ01 | 230,893,252 | 205,409 | 1,124.07 | 1,190 | 573 | 514,363 |
| WHDZ02 | 450,958,246 | 406,972 | 1,108.08 | 1,199 | 569 | 94,853 |
| WHDZ03 | 360,929,708 | 362,829 | 994.77 | 1,021 | 559 | 64,501 |

**Supplementary Figures**

**Supplementary Figure 1.** Annotation of EggNOG functional taxa


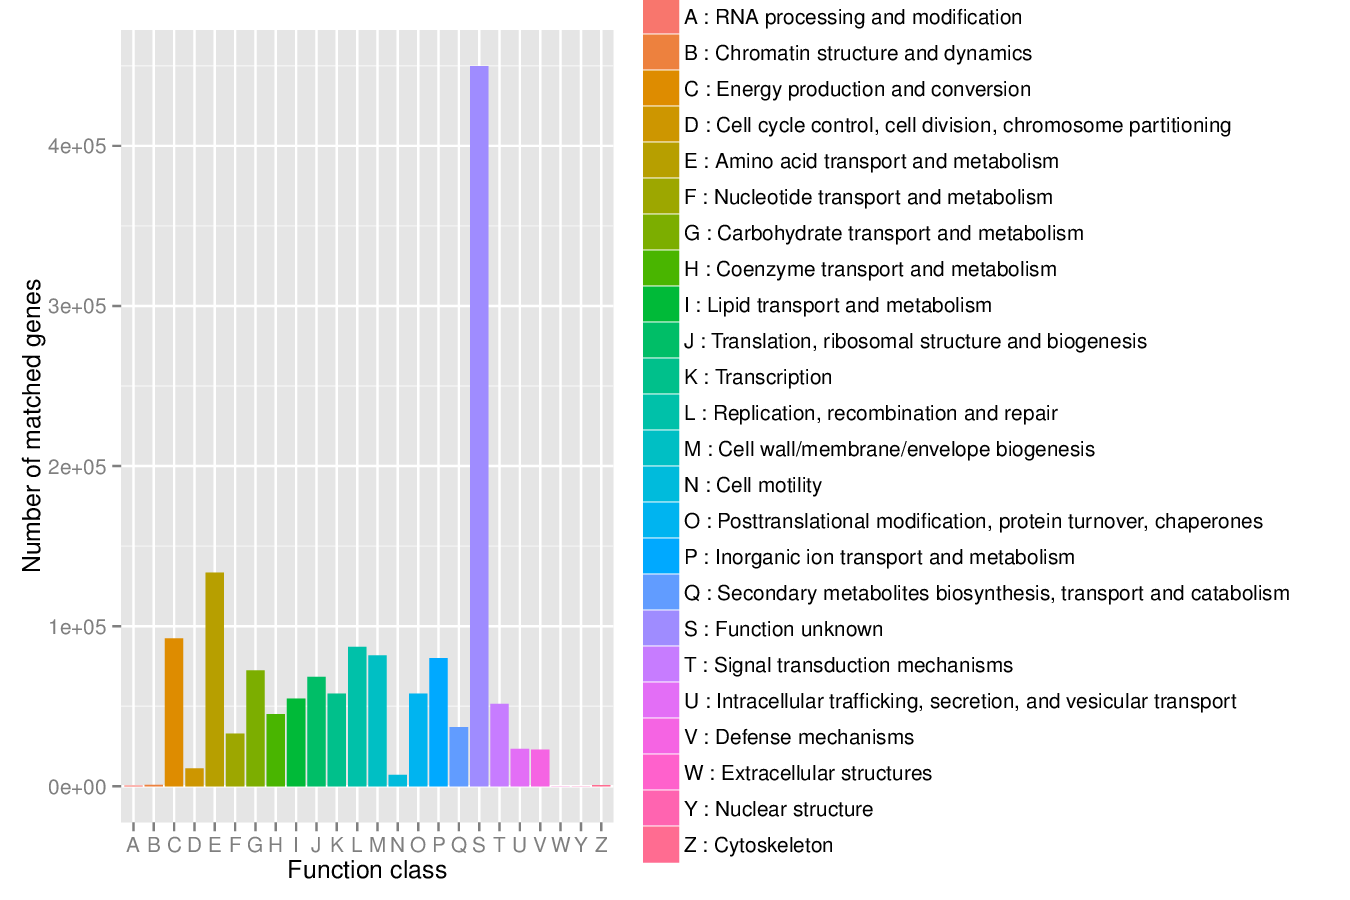


Fig. S1

**Supplementary Figure 2.** Abundance of different antibiotic resistance ontology in each sample

a: the relative abundance of all genes of ARO in each sample was amplified 106 times by the original relative abundance data; b: top20 relative abundance of AROs among all AROs.


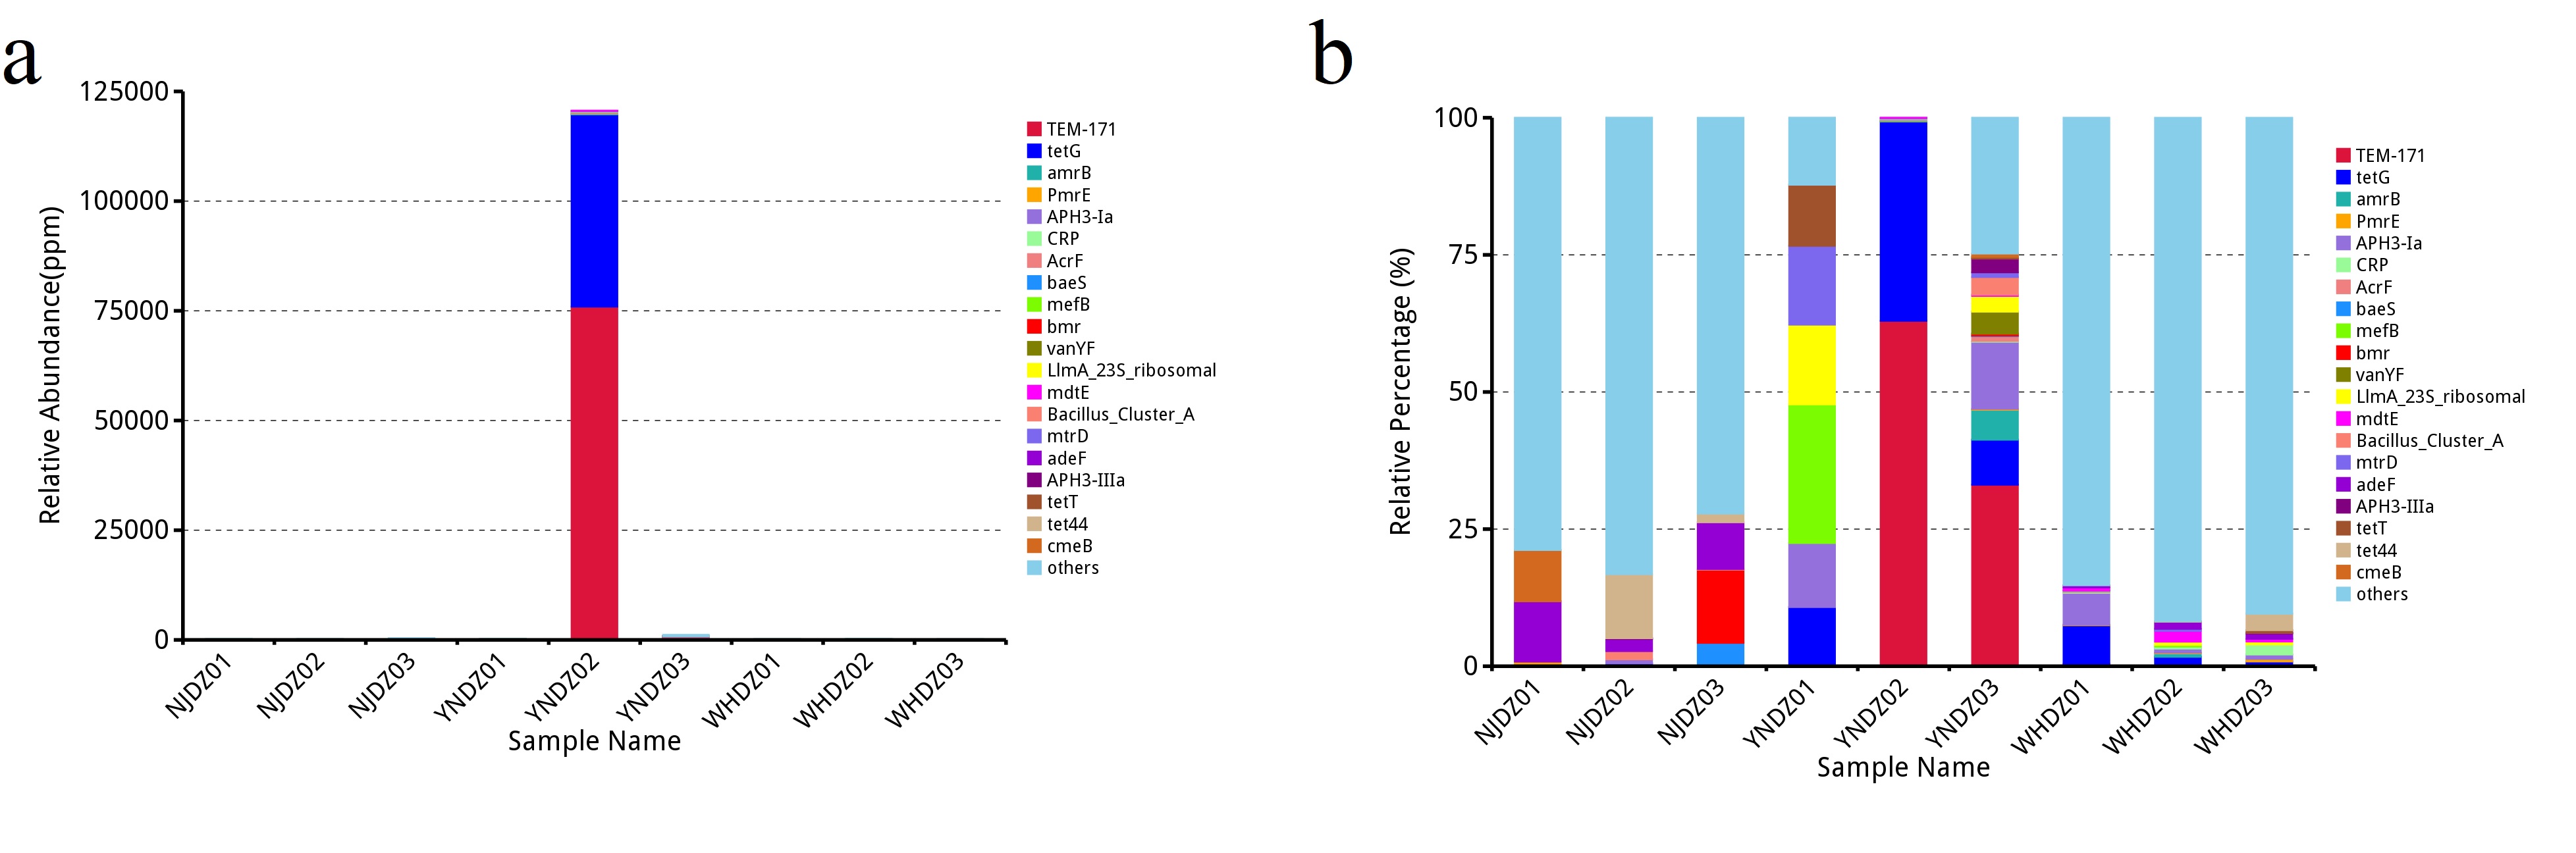


Fig. S2
